# Supplementary material for: Persistence and Microevolution of Pseudomonas aeruginosa in the Cystic Fibrosis Lung: A Single-Patient Longitudinal Genomic Study
Source: PubMed Central journal article supplement (PMC6340092; doi:10.3389/fmicb.2018.03242), 2019-01-11
Supplement: Image_1.pdf [file Image_1.pdf]

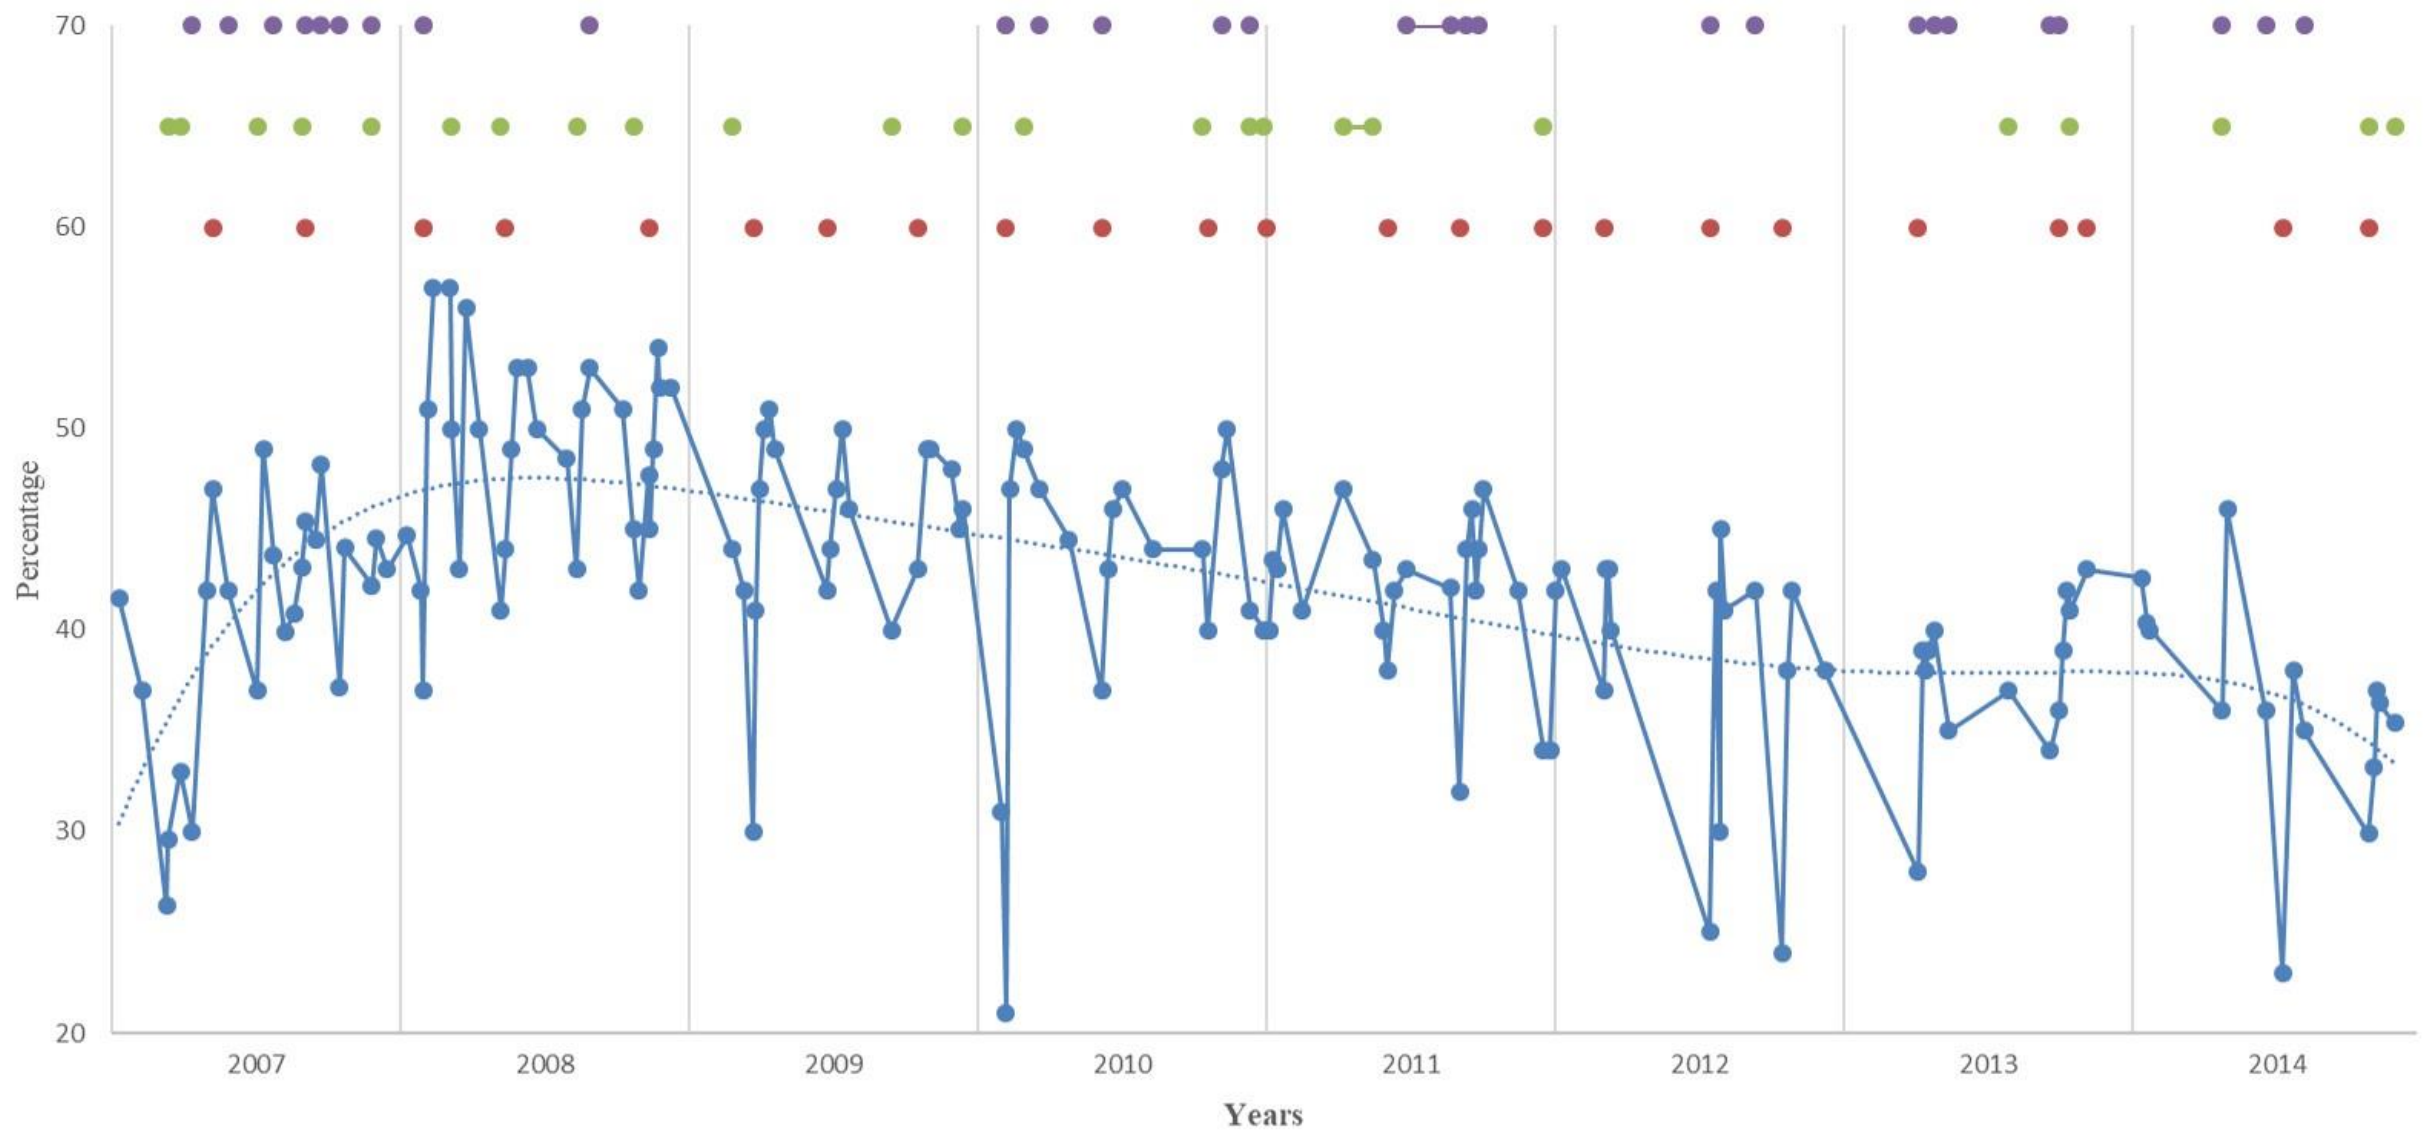

**Additional file 1: Figure S1. Time course of FEV1 (Forced Expiratory Volume in the 1st second), antibiotic therapies and strain isolation.** Intravenously administered antibiotics are shown in red; orally administered drugs are in green, isolation of bacterial strains from sputum samples is shown in purple. FEV1 values (percentages) and the trendline of FEV1 time course are shown.
