# Supplementary material for: Persistence and Microevolution of Pseudomonas aeruginosa in the Cystic Fibrosis Lung: A Single-Patient Longitudinal Genomic Study
Source: PubMed Central journal article supplement (PMC6340092; doi:10.3389/fmicb.2018.03242), 2019-01-11

**Additional file 5: Figure S3. Phylogenetic tree based on the distribution of accessory genes in the *P. aeruginosa* population.** The analysis was performed using the `hclust()` function from the base R package; core genes have been removed from the analysis to improve the resolution of the picture.

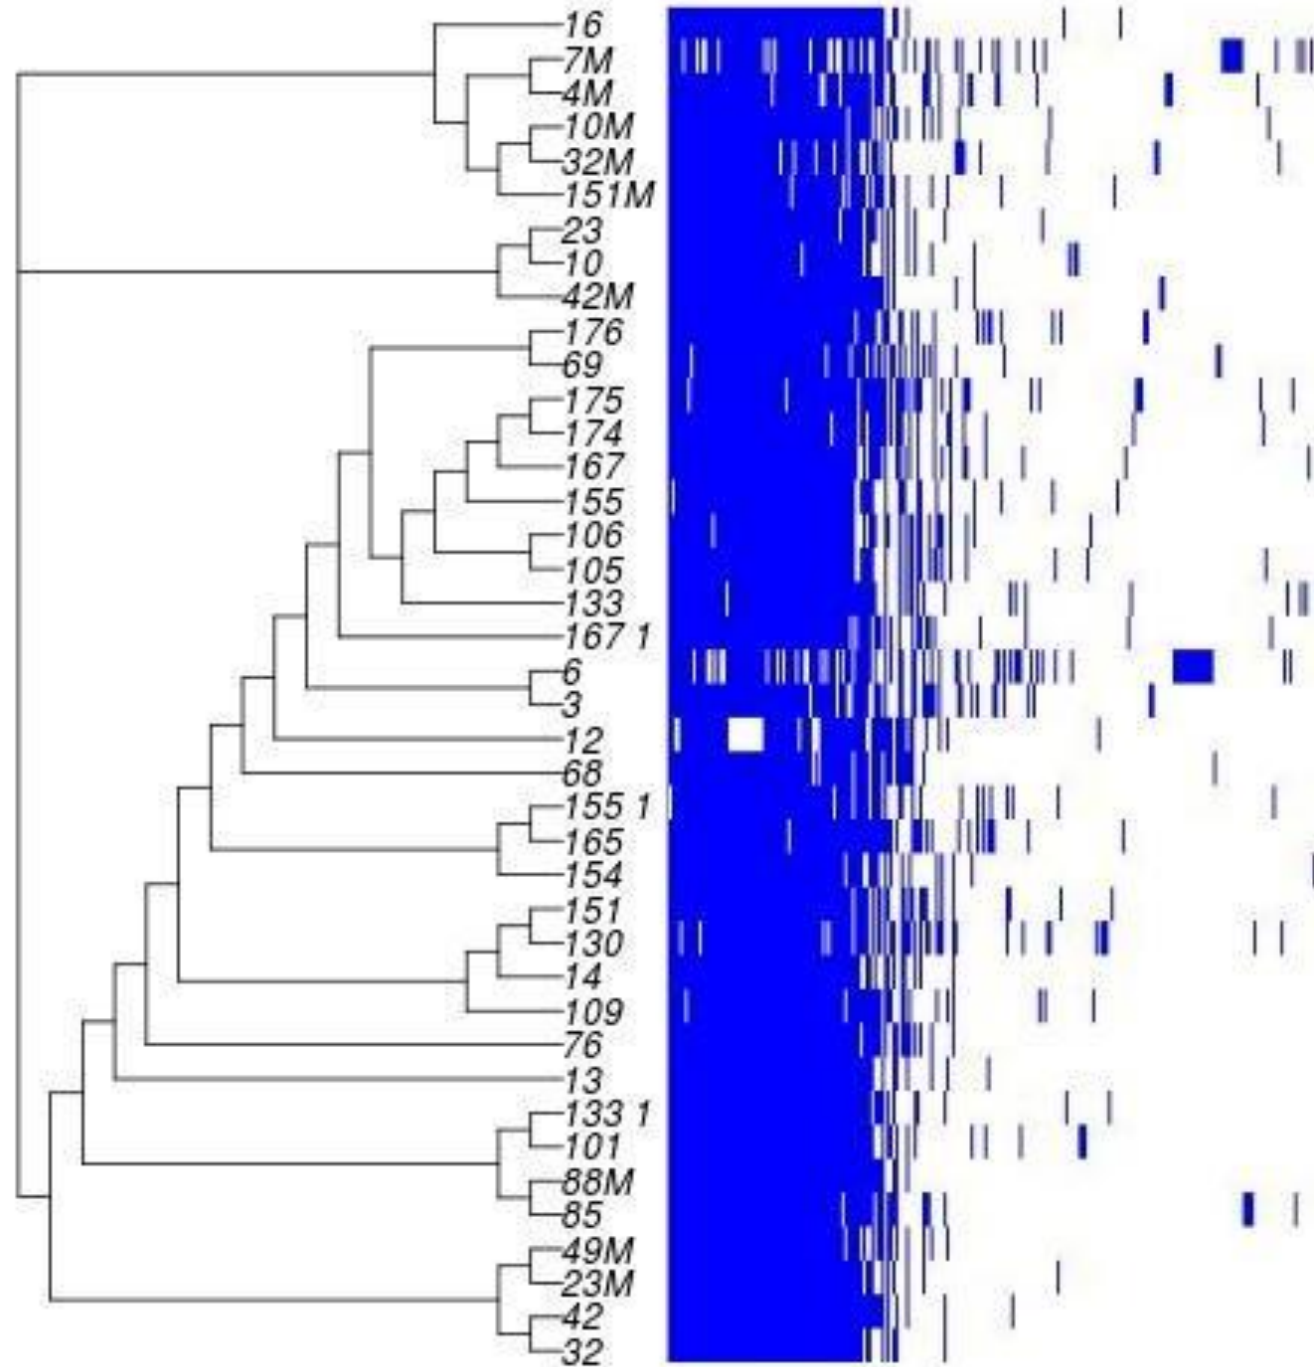

Supplement: Image_3.pdf [file Image_3.pdf]
