# Supplementary material for: Persistence and Microevolution of Pseudomonas aeruginosa in the Cystic Fibrosis Lung: A Single-Patient Longitudinal Genomic Study
Source: PubMed Central journal article supplement (PMC6340092; doi:10.3389/fmicb.2018.03242), 2019-01-11

**Additional file 6: Figure S4. Heatmap derived from the presence/absence matrix of accessory genes within the population.**

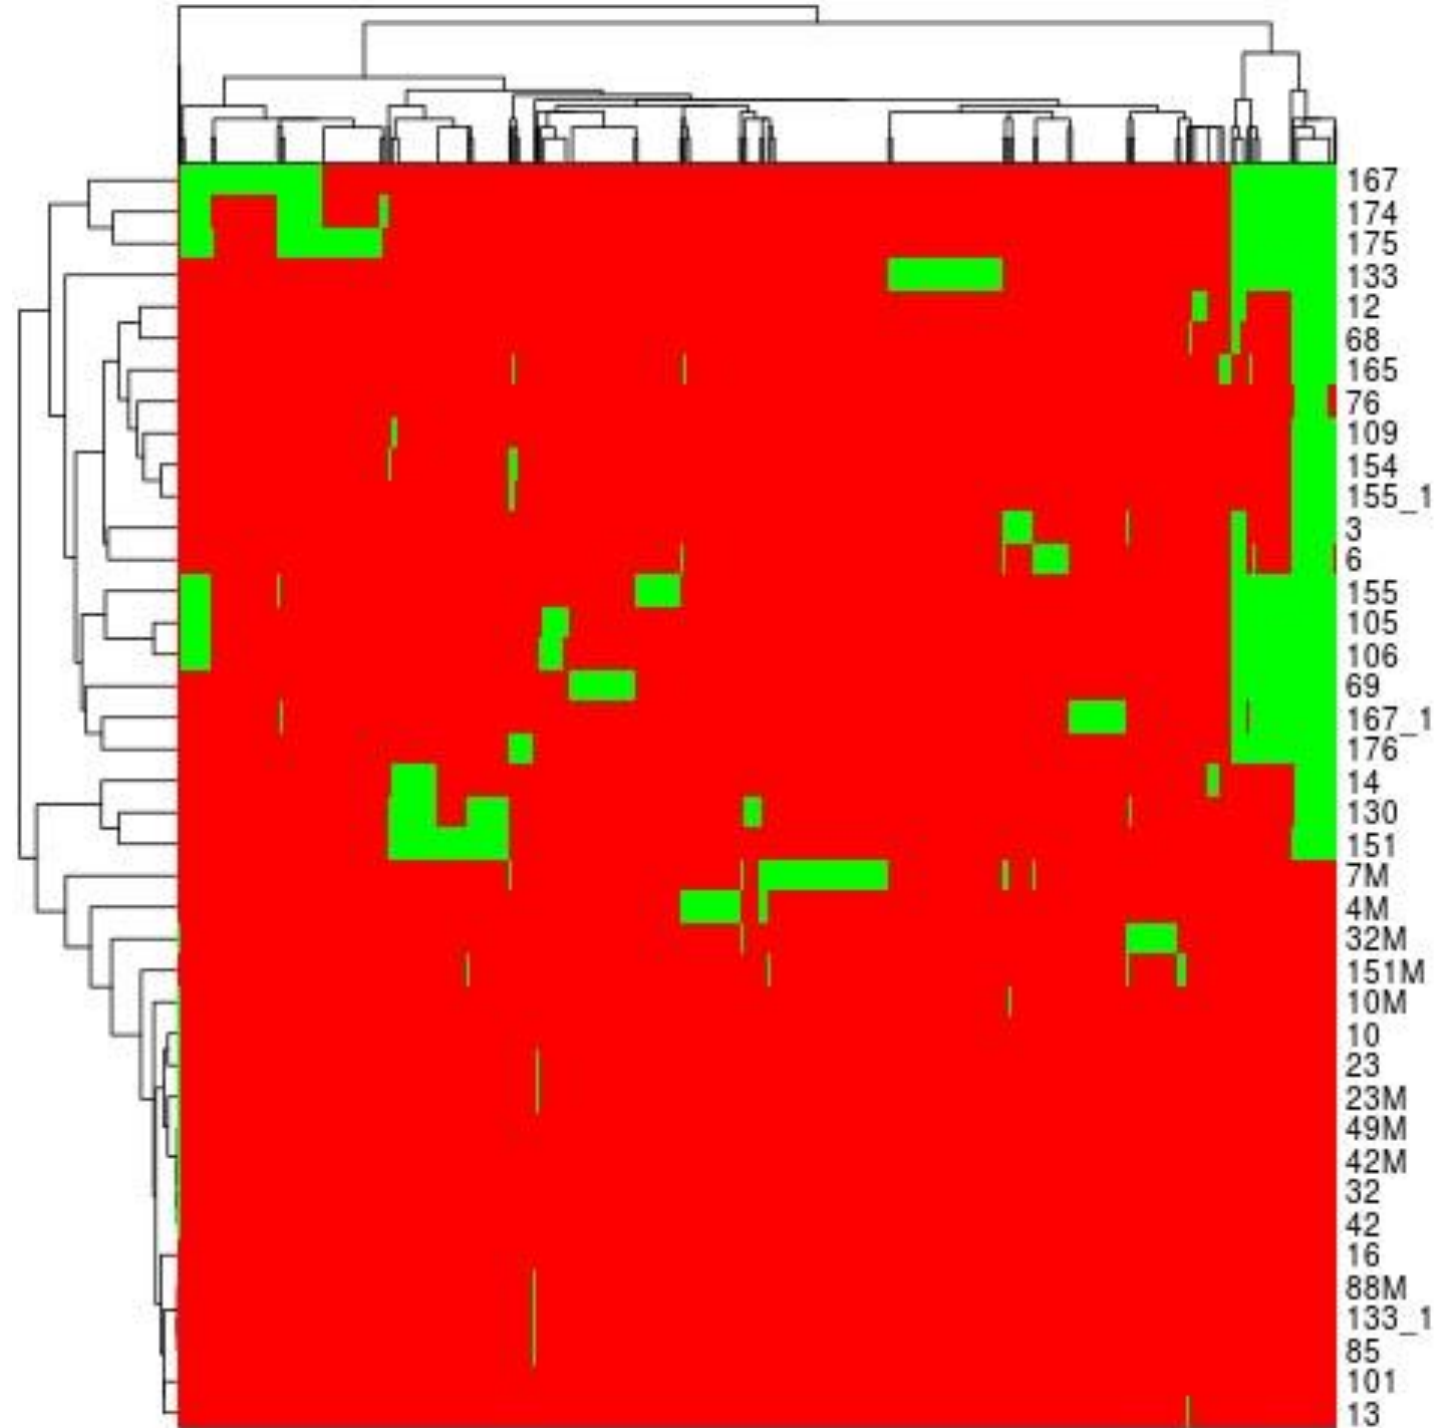

Supplement: Image_4.pdf [file Image_4.pdf]
