# Supplementary material for: Persistence and Microevolution of Pseudomonas aeruginosa in the Cystic Fibrosis Lung: A Single-Patient Longitudinal Genomic Study
Source: PubMed Central journal article supplement (PMC6340092; doi:10.3389/fmicb.2018.03242), 2019-01-11

**Additional file 7: Figure S5:  
Heatmap of TA genes.**

Abundance of TA genes in the population, both isolates genomes and genes were clustered using the complete-linkage method.

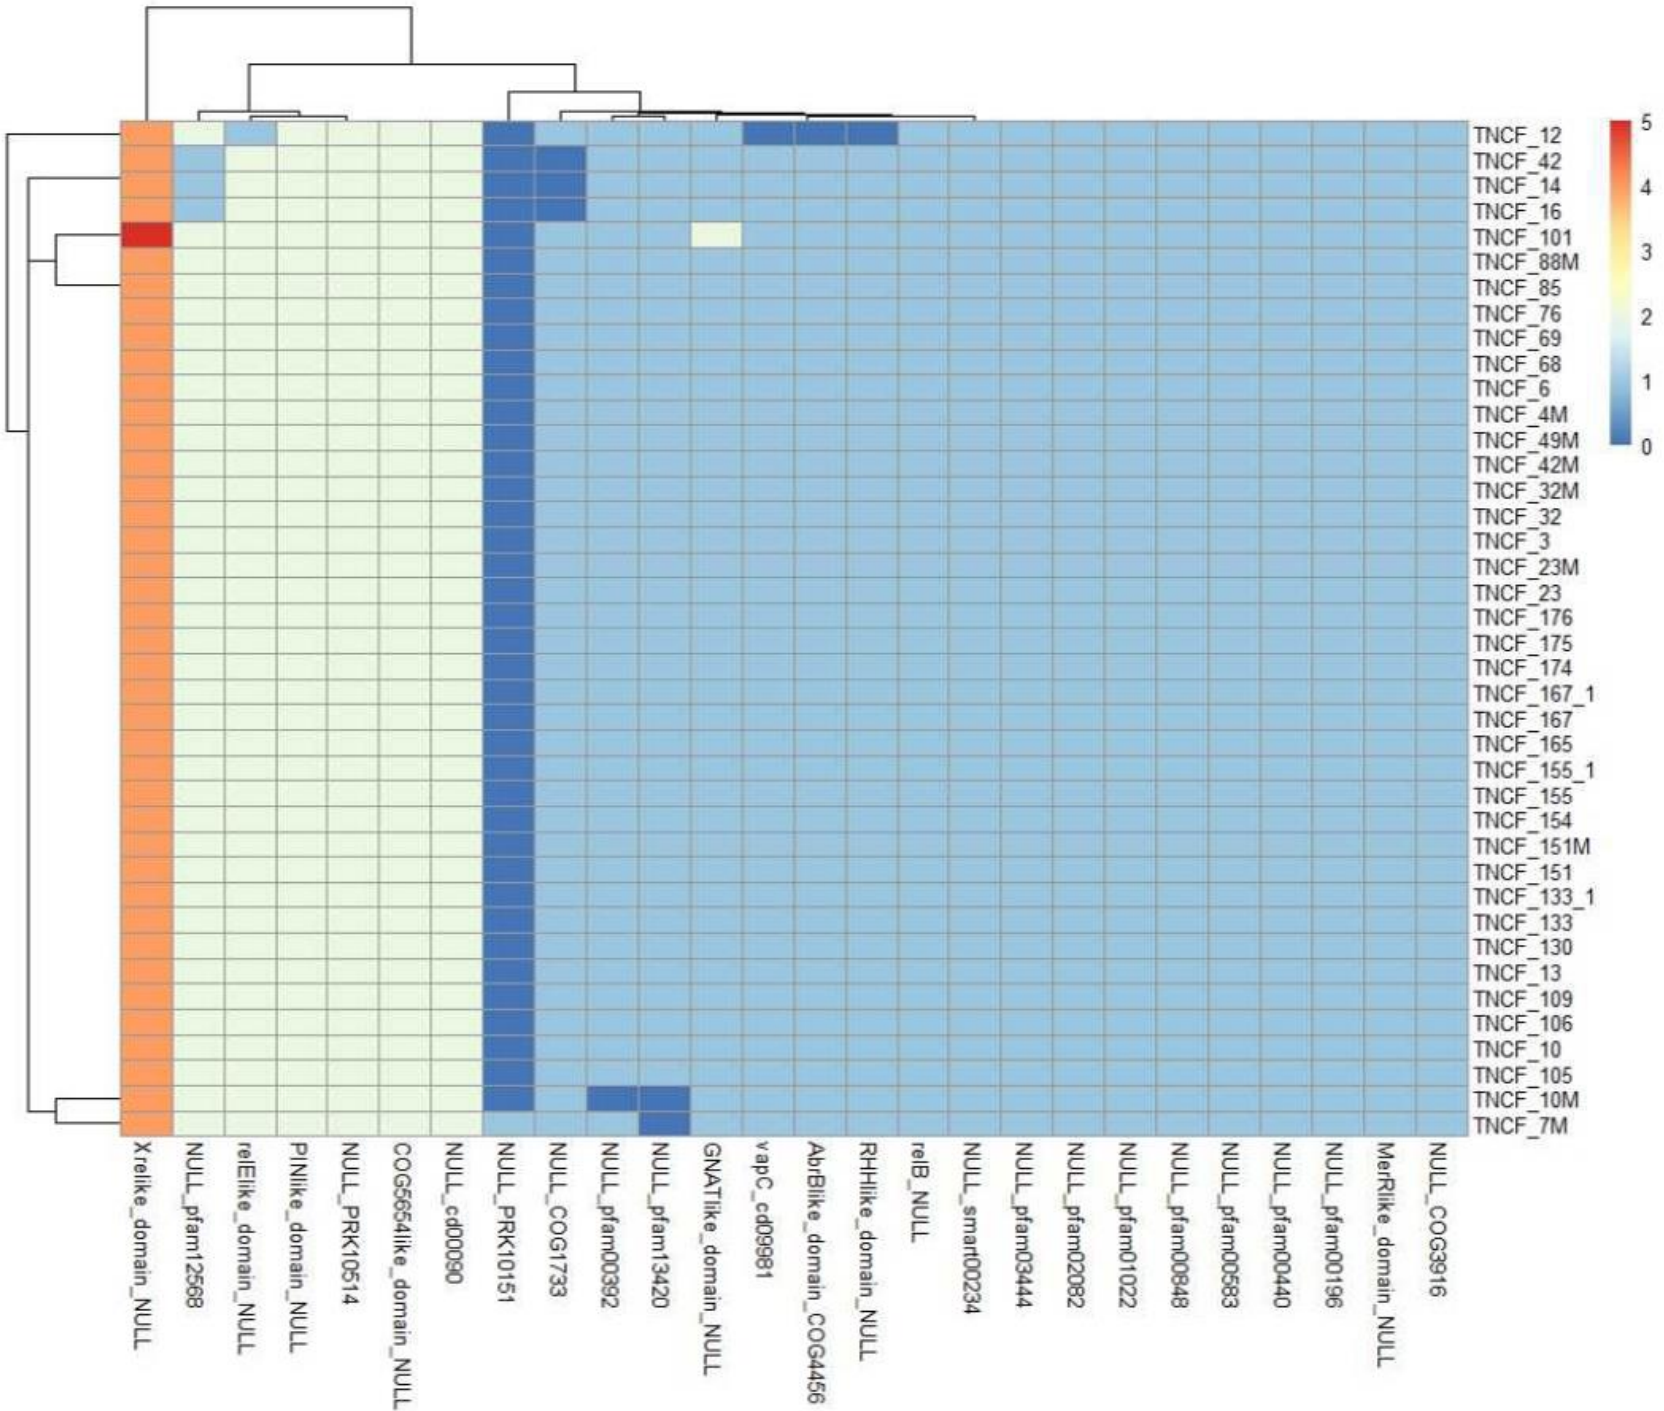

Supplement: Image_5.pdf [file Image_5.pdf]
