# Supplementary material for: Persistence and Microevolution of Pseudomonas aeruginosa in the Cystic Fibrosis Lung: A Single-Patient Longitudinal Genomic Study
Source: PubMed Central journal article supplement (PMC6340092; doi:10.3389/fmicb.2018.03242), 2019-01-11

**Additional file 8: Figure S6.**  
**Heatmap representation of the distance matrix between pairs of isolates based on core genome variants with moderate impact.** The graph was obtained using the R-function heatmap() with all default parameters.

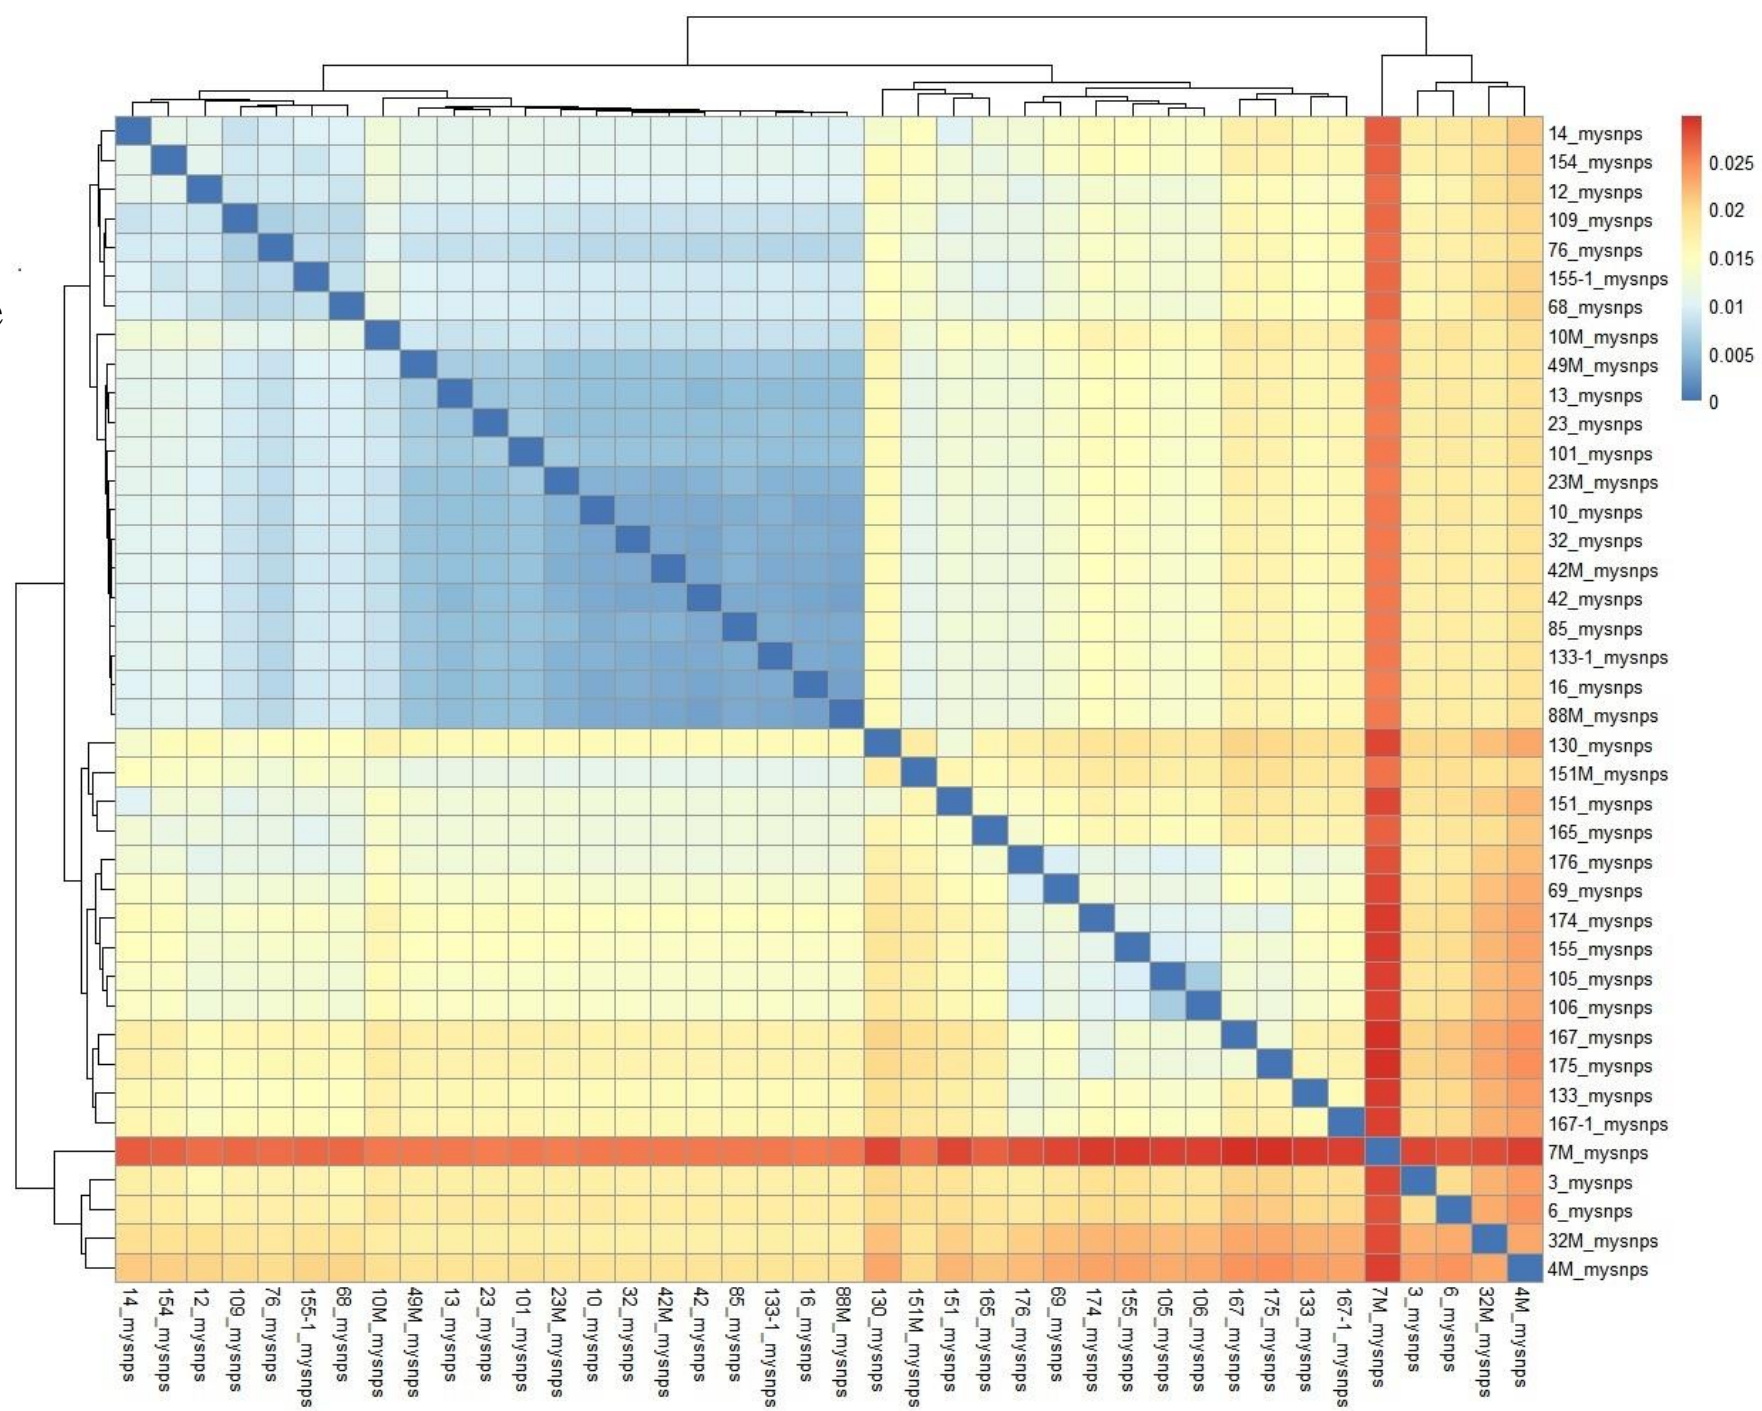

Supplement: Image_6.pdf [file Image_6.pdf]
