# Supplementary material for: Persistence and Microevolution of Pseudomonas aeruginosa in the Cystic Fibrosis Lung: A Single-Patient Longitudinal Genomic Study
Source: PubMed Central journal article supplement (PMC6340092; doi:10.3389/fmicb.2018.03242), 2019-01-11
Supplement: Image_7.pdf [file Image_7.pdf]

**Additional file 9: Figure S7. Increase over time of multidrug-resistant isolates.** Isolates are ordered according to sampling time. Resistant, intermediate, and susceptible isolates are highlighted in red, yellow and green, respectively.

| Isolate    | Aminoglycosides |            | β-lactams |           | Carbapenem | Ceftazidime | Cefepime | Fluoroquinolones |              | Phenolic    | Polymyxin | Penicillin/β-lactam |
|------------|-----------------|------------|-----------|-----------|------------|-------------|----------|------------------|--------------|-------------|-----------|---------------------|
|            | Amitacin        | Gentamicin | Imipenem  | Meropenem | Doripenem  |             |          | Ciprofloxacin    | Levofloxacin | Fo:fo.G6fo: | Colistin  | Piper/Tazo          |
| TNCF_3     | >16             | >8         | >8        | 8         | >8         | >0.25       | >0.2     | >0.25            | >8           | >8          | 1         | >0.25               |
| TNCF_4M    | 8               | 4          | 1         | >0.12     | >0.5       | 0.25        | 2        | >0.25            | 1            | 8           | >0.5      | >2/4                |
| TNCF_6     | >16             | >8         | >8        | >8        | >8         | >0.25       | >0.2     | >0.25            | >8           | >8          | >0.5      | >0.25               |
| TNCF_7M    | 8               | 2          | 1         | >0.12     | 0.5        | 0.5         | 4        | 0.5              | 1            | 12          | 1         | >2/4                |
| TNCF_10    | >8              | 2          | >1        | >0.12     | >0.5       | 1           | 4        | >0.25            | >1           | 12          | 1         | >2/4                |
| TNCF_10M   | >8              | 2          | >1        | >0.12     | >0.5       | 0.25        | 4        | 0.25             | >1           | >8          | >0.5      | >2/4                |
| TNCF_12    | >16             | >8         | >8        | >8        | >8         | >0.25       | >0.2     | >0.25            | >8           | >8          | >0.5      | >0.25               |
| TNCF_13    | 8               | 4          | 2         | >0.12     | >0.5       | 2           | 8        | 0.5              | >1           | >8          | 1         | >2/4                |
| TNCF_14    | >16             | >8         | 8         | 8         | >8         | >0.25       | >0.2     | >0.25            | >8           | >8          | >0.5      | >0.25               |
| TNCF_16    | >16             | 4          | 2         | >0.12     | >0.5       | 1           | 4        | >0.25            | >1           | 12          | 1         | >2/4                |
| TNCF_23    | >8              | 2          | >1        | >0.12     | >0.5       | 2           | 8        | 0.25             | >1           | 12          | 2         | >2/4                |
| TNCF_23M   | >8              | 2          | >1        | >0.12     | 2          | 1           | 8        | 0.5              | >1           | 12          | 1         | >2/4                |
| TNCF_32    | 8               | 4          | >1        | >0.12     | >0.5       | 1           | 8        | 0.5              | 2            | >8          | 1         | >2/4                |
| TNCF_32M   | >8              | 2          | >1        | >0.12     | >0.5       | 1           | 8        | 0.25             | 1            | 12          | 1         | >2/4                |
| TNCF_42    | >8              | 2          | >1        | >0.12     | >0.5       | 1           | 8        | 0.5              | >1           | 12          | 1         | >2/4                |
| TNCF_42M   | 4               | 1          | 1         | >0.12     | >0.5       | 0.25        | 4        | >0.25            | 1            | 8           | 1         | >2/4                |
| TNCF_49M   | >8              | 2          | >1        | >0.12     | >0.5       | 2           | 8        | 0.25             | >1           | 12          | 1         | >2/4                |
| TNCF_68    | >16             | >8         | >8        | 8         | 8          | >0.25       | >0.2     | >0.25            | >8           | >8          | 1         | >0.25               |
| TNCF_69    | >16             | >8         | >8        | >8        | >8         | >0.25       | >0.2     | >0.25            | >8           | >8          | >0.5      | >0.25               |
| TNCF_76    | >16             | >8         | >16       | 8         | 8          | >0.25       | >0.2     | >0.25            | >8           | >8          | 1         | >0.25               |
| TNCF_85    | 8               | 4          | 2         | 0.25      | >0.5       | 2           | 8        | 2                | >8           | >8          | >0.5      | 4/8/8               |
| TNCF_88M   | 8               | 2          | 4         | 0.25      | >0.5       | 2           | 2        | 2                | >8           | >8          | >0.5      | >2/4                |
| TNCF_101   | >16             | >8         | >8        | >8        | 8          | >0.25       | >0.2     | >0.25            | >8           | >8          | >0.5      | >0.25               |
| TNCF_105   | >16             | >8         | >8        | >8        | 8          | >0.25       | >0.2     | >0.25            | >8           | >8          | >0.5      | >0.25               |
| TNCF_106   | >16             | >8         | 8         | 8         | 8          | >0.25       | >0.2     | 1                | 2            | >8          | >0.5      | >0.25               |
| TNCF_109   | >16             | >8         | >8        | >8        | 8          | >0.25       | >0.2     | >0.25            | >8           | >8          | >0.5      | >0.25               |
| TNCF_130   | >16             | >8         | >8        | 8         | 8          | >0.25       | >0.2     | >0.25            | >8           | >8          | >0.5      | >0.25               |
| TNCF_133   | >16             | >8         | >8        | >8        | 8          | >0.25       | >0.2     | >0.25            | >8           | >8          | >0.5      | >0.25               |
| TNCF_133_1 | >16             | >8         | >8        | 2         | 2          | 8           | >0.2     | >0.25            | >8           | >8          | >0.5      | >0.25               |
| TNCF_151   | >16             | >8         | >8        | >8        | 8          | >0.25       | >0.2     | >0.25            | >8           | >8          | 1         | >0.25               |
| TNCF_151M  | >16             | 4          | >1        | >0.12     | >0.5       | 0.25        | 2        | 0.25             | >1           | >8          | >0.5      | >2/4                |
| TNCF_154   | >16             | >8         | >8        | >8        | 8          | >0.25       | >0.2     | >0.25            | >8           | >8          | 1         | >0.25               |
| TNCF_155   | >16             | >8         | >8        | >8        | 8          | >0.25       | >0.2     | >0.25            | >8           | >8          | >0.5      | >0.25               |
| TNCF_155_1 | >16             | >8         | >8        | >8        | 8          | >0.25       | >0.2     | >0.25            | >8           | >8          | 1         | >0.25               |
| TNCF_165   | >16             | >8         | >8        | >8        | 8          | >0.25       | >0.2     | >0.25            | >8           | >8          | 1         | >0.25               |
| TNCF_167   | >16             | >8         | >8        | >8        | 8          | >0.25       | >0.2     | >0.25            | >8           | >8          | >0.5      | >0.25               |
| TNCF_167_1 | >16             | >8         | >8        | >8        | 8          | >0.25       | >0.2     | >0.25            | >8           | >8          | 1         | >0.25               |
| TNCF_174   | >16             | >8         | >8        | >8        | 8          | >0.25       | >0.2     | >0.25            | >8           | >8          | >0.5      | >0.25               |
| TNCF_175   | >16             | >8         | >8        | >8        | 8          | >0.25       | >0.2     | 1                | 8            | >8          | >0.5      | >0.25               |
| TNCF_176   | >16             | >8         | >8        | >8        | 8          | >0.25       | >0.2     | >0.25            | >8           | >8          | 1         | >0.25               |
