# Supplementary material for: Persistence and Microevolution of Pseudomonas aeruginosa in the Cystic Fibrosis Lung: A Single-Patient Longitudinal Genomic Study
Source: PubMed Central journal article supplement (PMC6340092; doi:10.3389/fmicb.2018.03242), 2019-01-11
Supplement: Image_8.pdf [file Image_8.pdf]

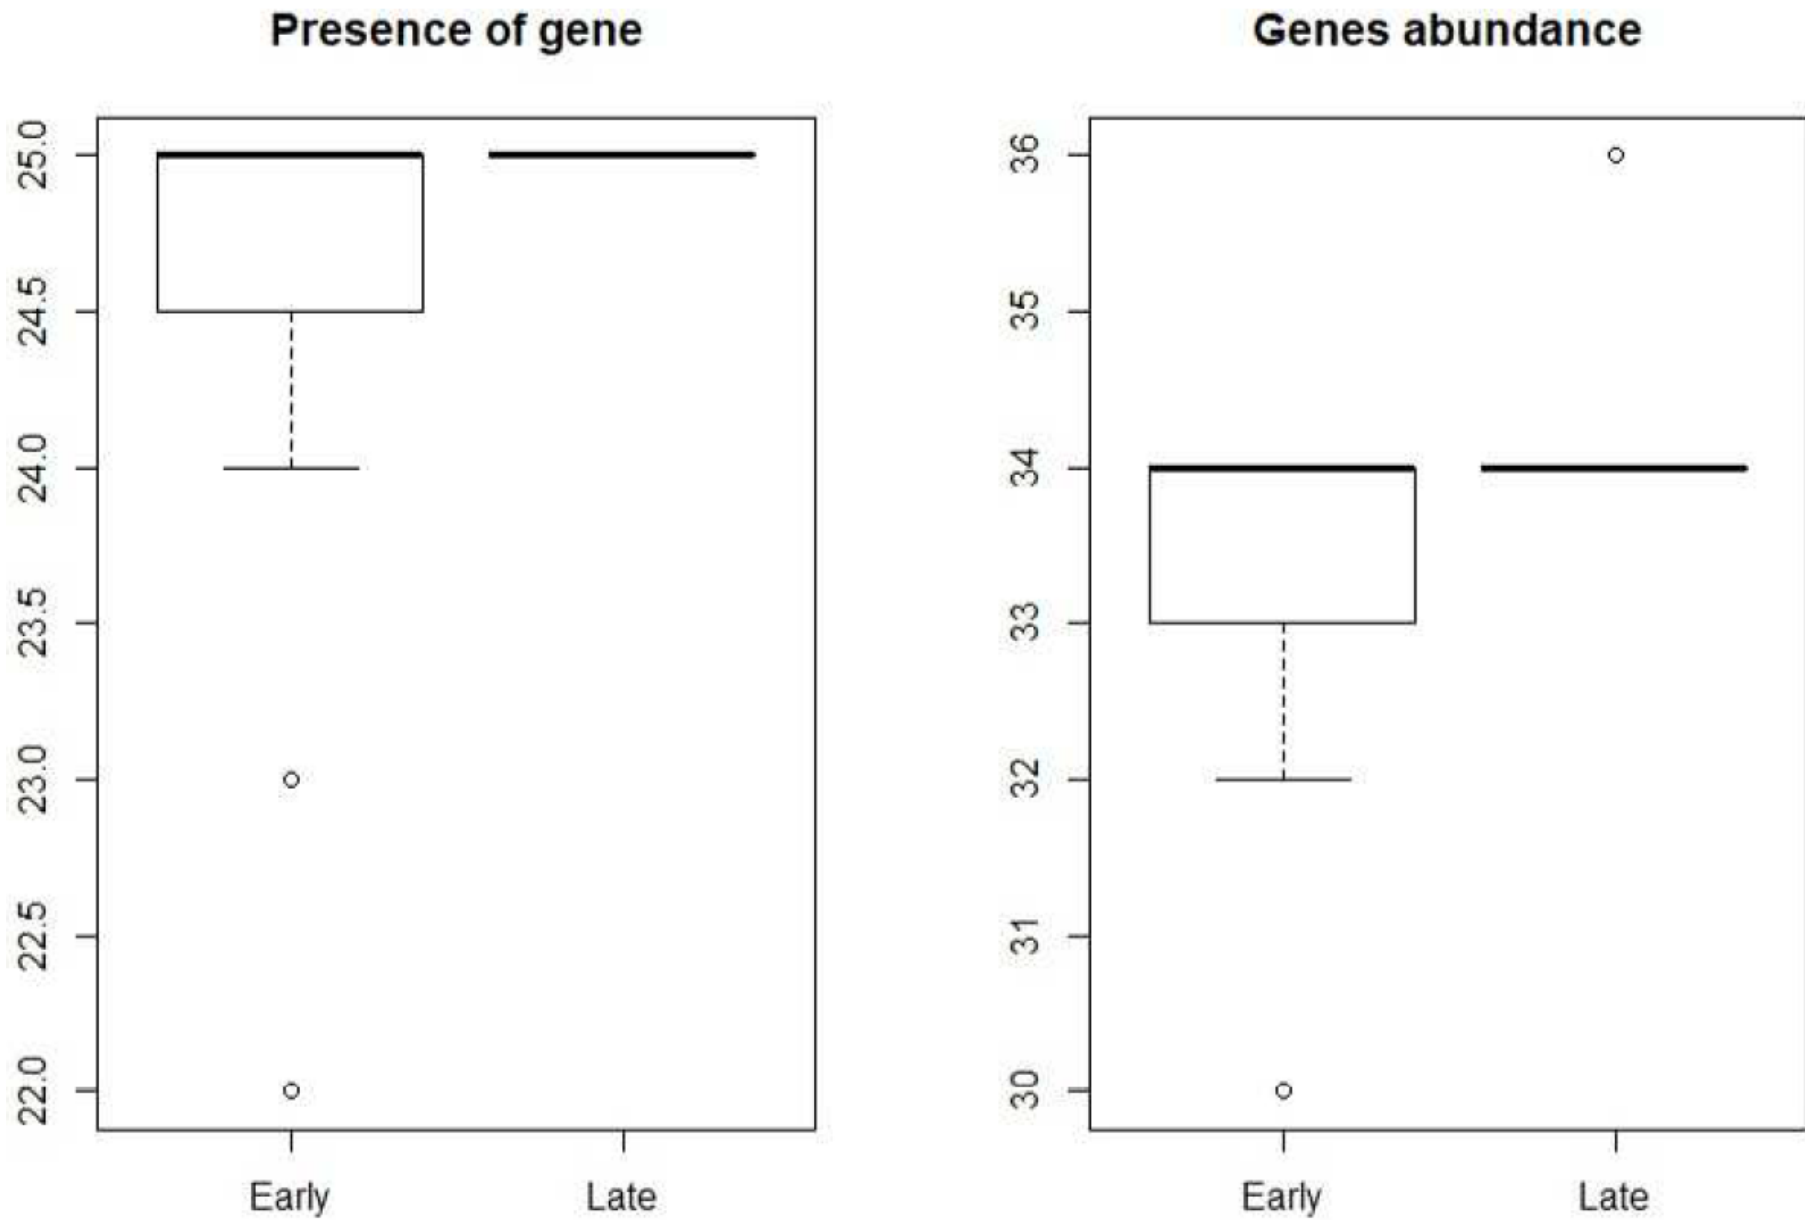

**Additional file 10: Figure S8: Boxplots of TA genes.**

Boxplots resuming the number of TA genes (left) and their total abundance (right) in the genomes from early and late strains.
