# Supplementary material for: Persistence and Microevolution of Pseudomonas aeruginosa in the Cystic Fibrosis Lung: A Single-Patient Longitudinal Genomic Study
Source: PubMed Central journal article supplement (PMC6340092; doi:10.3389/fmicb.2018.03242), 2019-01-11

## Additional file 14: Figure S9: Piechart resuming SNPs distribution.

Distribution of high impact SNPs found in the population according to COG categories.

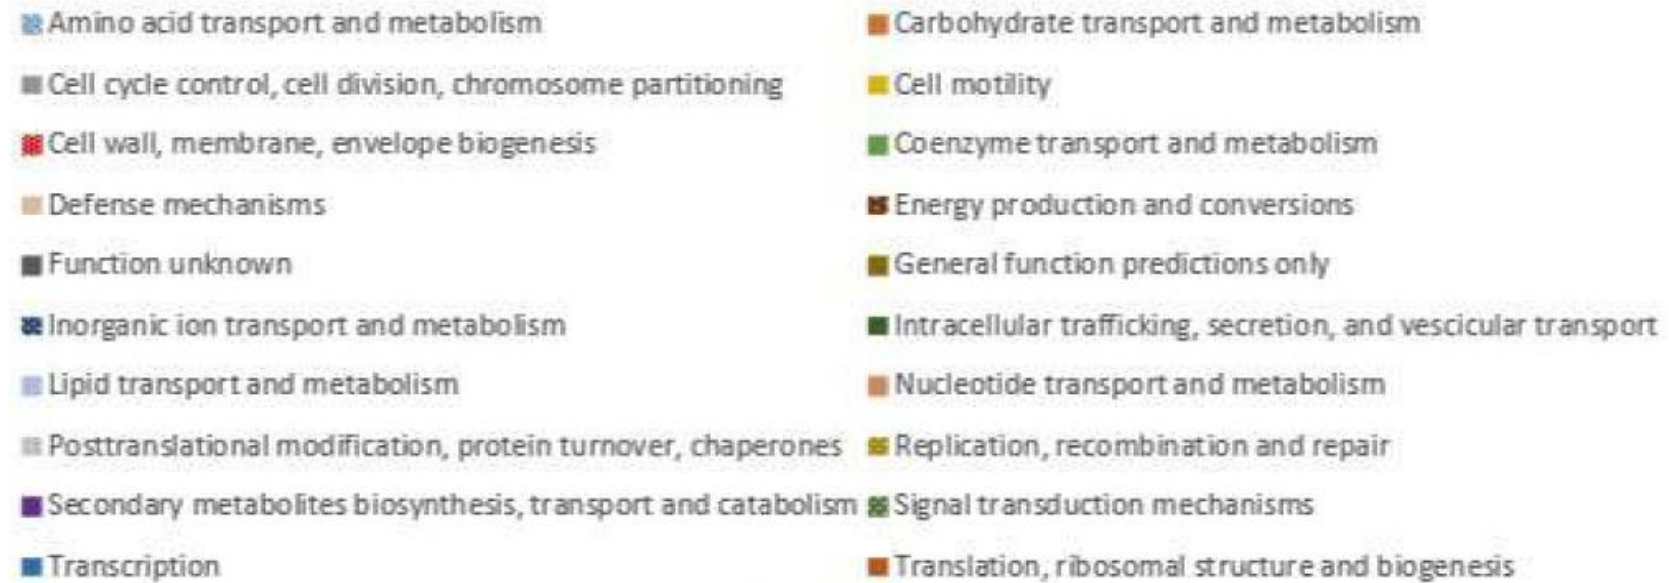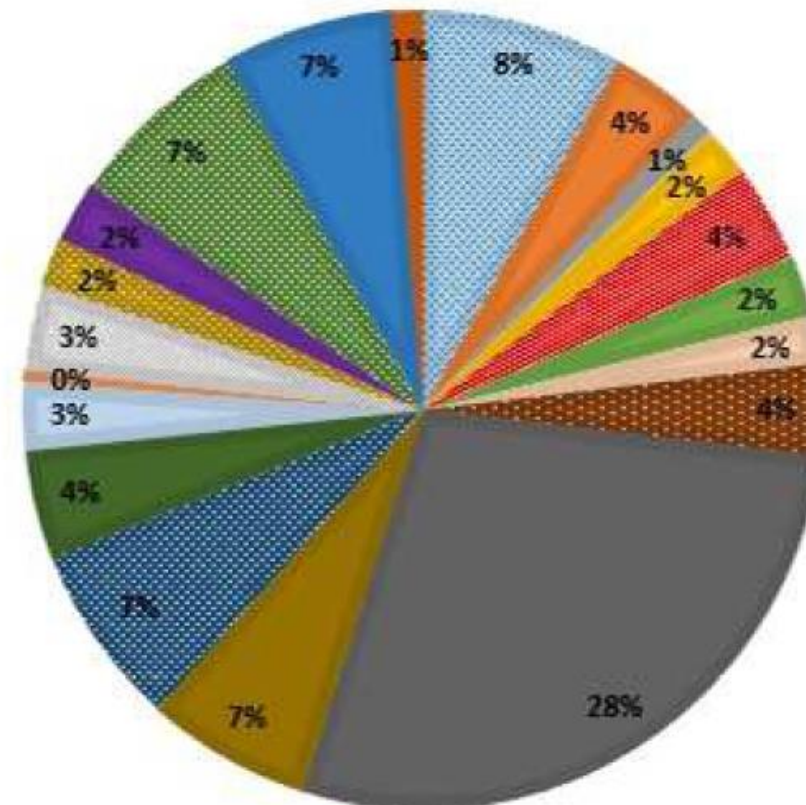

Supplement: Image_9.pdf [file Image_9.pdf]
