# Supplementary material for: Persistence and Microevolution of Pseudomonas aeruginosa in the Cystic Fibrosis Lung: A Single-Patient Longitudinal Genomic Study
Source: PubMed Central journal article supplement (PMC6340092; doi:10.3389/fmicb.2018.03242), 2019-01-11
Supplement: Table_1.pdf [file Table_1.pdf]

**Additional file 2: Table S1. Antibiotics therapies administered to the patient during the course of this study.**

| Date       | FEV1 % | Antibiotics e.v.                     | Antibiotics per os |
|------------|--------|--------------------------------------|--------------------|
| 11/01/2007 | 41.60  |                                      |                    |
| 09/02/2007 | 37.00  |                                      |                    |
| 12/03/2007 | 26.30  |                                      |                    |
| 14/03/2007 | 29.65  |                                      | ciprofloxacin      |
| 30/03/2007 | 33.00  |                                      | cefalexin          |
| 13/04/2007 | 30.00  |                                      |                    |
| 02/05/2007 | 42.00  |                                      |                    |
| 10/05/2007 | 47.00  | ceftazidime, tobramycin, targocid    |                    |
| 29/05/2007 | 42.00  |                                      |                    |
| 05/07/2007 | 37.00  |                                      | ciprofloxacin      |
| 13/07/2007 | 49.00  |                                      |                    |
| 26/07/2007 | 43.70  |                                      |                    |
| 09/08/2007 | 39.90  |                                      |                    |
| 21/08/2007 | 40.80  |                                      |                    |
| 31/08/2007 | 43.10  |                                      | ciprofloxacin      |
| 04/09/2007 | 45.40  | targocid, ceftazidime                |                    |
| 17/09/2007 | 44.50  |                                      |                    |
| 24/09/2007 | 48.20  |                                      |                    |
| 17/10/2007 | 37.20  |                                      |                    |
| 24/10/2007 | 44.10  |                                      |                    |
| 27/11/2007 | 42.20  |                                      | azithromycin       |
| 03/12/2007 | 44.60  |                                      |                    |
| 17/12/2007 | 43.00  |                                      |                    |
| 11/01/2008 | 44.70  |                                      |                    |
| 28/01/2008 | 42.00  |                                      |                    |
| 31/01/2008 | 37.00  | teicoplanin, tobramycin, ceftazidime |                    |
| 06/02/2008 | 51.00  |                                      |                    |
| 13/02/2008 | 57.00  |                                      |                    |
| 05/03/2008 | 57.00  |                                      |                    |
| 07/03/2008 | 50.00  |                                      | ciprofloxacin      |
| 17/03/2008 | 43.00  |                                      |                    |
| 26/03/2008 | 56.00  |                                      |                    |
| 11/04/2008 | 50.00  |                                      |                    |
| 09/05/2008 | 41.00  |                                      | ciprofloxacin      |
| 14/05/2008 | 44.00  | teicoplanin, tobramycin, ceftazidime |                    |
| 22/05/2008 | 49.00  |                                      |                    |
| 29/05/2008 | 53.00  |                                      |                    |
| 12/06/2008 | 53.00  |                                      |                    |
| 23/06/2008 | 50.00  |                                      |                    |
| 31/07/2008 | 48.50  |                                      |                    |
| 13/08/2008 | 43.00  |                                      | cefalexin          |
| 20/08/2008 | 51.00  |                                      |                    |

|            |       |                                       |               |
|------------|-------|---------------------------------------|---------------|
| 29/08/2008 | 53.00 |                                       |               |
| 10/10/2008 | 51.00 |                                       |               |
| 24/10/2008 | 45.00 |                                       | ciprofloxacin |
| 31/10/2008 | 42.00 |                                       |               |
| 12/11/2008 | 47.70 |                                       |               |
| 13/11/2008 | 45.00 | teicoplanin, tobramycin, ceftazidime  |               |
| 18/11/2008 | 49.00 |                                       |               |
| 24/11/2008 | 54.00 |                                       |               |
| 26/11/2008 | 52.00 |                                       |               |
| 10/12/2008 | 52.00 |                                       |               |
| 26/02/2009 | 44.00 |                                       | ciprofloxacin |
| 13/03/2009 | 42.00 |                                       |               |
| 25/03/2009 | 30.00 | teicoplanin, tobramycin, ceftazidime  |               |
| 27/03/2009 | 41.00 |                                       |               |
| 01/04/2009 | 47.00 |                                       |               |
| 07/04/2009 | 50.00 |                                       |               |
| 14/04/2009 | 51.00 |                                       |               |
| 21/04/2009 | 49.00 |                                       |               |
| 26/06/2009 | 42.00 | teicoplanin, tobramycin, ceftazidime  |               |
| 30/06/2009 | 44.00 |                                       |               |
| 08/07/2009 | 47.00 |                                       |               |
| 15/07/2009 | 50.00 |                                       |               |
| 24/07/2009 | 46.00 |                                       |               |
| 16/09/2009 | 40.00 |                                       | ciprofloxacin |
| 19/10/2009 | 43.00 | piperacillin, tazobactam, teicoplanin |               |
| 30/10/2009 | 49.00 |                                       |               |
| 04/11/2009 | 49.00 |                                       |               |
| 01/12/2009 | 48.00 |                                       |               |
| 11/12/2009 | 45.00 |                                       |               |
| 15/12/2009 | 46.00 |                                       | ciprofloxacin |
| 02/02/2010 | 31.00 |                                       |               |
| 08/02/2010 | 21.00 | piperacillin, tazobactam, teicoplanin |               |
| 12/02/2010 | 47.00 |                                       |               |
| 21/02/2010 | 50.00 |                                       |               |
| 02/03/2010 | 49.00 |                                       | ciprofloxacin |
| 22/03/2010 | 47.00 |                                       |               |
| 16/04/2010 |       |                                       |               |
| 28/04/2010 | 44.50 |                                       |               |
| 09/06/2010 | 37.00 | piperacillin, tazobactam, teicoplanin |               |
| 17/06/2010 | 43.00 |                                       |               |
| 23/06/2010 | 46.00 |                                       |               |
| 05/07/2010 | 47.00 |                                       |               |
| 13/08/2010 | 44.00 |                                       |               |

|            |       |                                        |               |
|------------|-------|----------------------------------------|---------------|
| 15/10/2010 | 44.00 |                                        | ciprofloxacin |
| 21/10/2010 | 40.00 | tazocin, targocid                      |               |
| 08/11/2010 | 48.00 |                                        |               |
| 15/11/2010 | 50.00 |                                        |               |
| 14/12/2010 | 41.00 |                                        | doxycycline   |
| 31/12/2010 | 40.00 |                                        | doxycycline   |
| 03/01/2011 | 40.00 | piperacillin, tazobactam, teicoplanin  |               |
| 07/01/2011 | 40.00 |                                        |               |
| 12/01/2011 | 43.50 |                                        |               |
| 17/01/2011 | 43.00 |                                        |               |
| 25/01/2011 | 46.00 |                                        |               |
| 18/02/2011 | 41.00 |                                        |               |
| 11/04/2011 | 47.00 |                                        | doxycycline   |
| 19/05/2011 | 43.50 |                                        | doxycycline   |
| 01/06/2011 | 40.00 |                                        |               |
| 06/06/2011 | 38.00 | tazocin, targocid                      |               |
| 15/06/2011 | 42.00 |                                        |               |
| 30/06/2011 | 43.00 |                                        |               |
| 25/08/2011 | 42.10 |                                        |               |
| 06/09/2011 | 32.00 | piperacillin, ceftazidime, teicoplanin |               |
| 14/09/2011 | 44.00 |                                        |               |
| 21/09/2011 | 46.00 |                                        |               |
| 26/09/2011 | 42.00 |                                        |               |
| 30/09/2011 | 44.00 |                                        |               |
| 06/10/2011 | 47.00 |                                        |               |
| 18/11/2011 | 42.00 |                                        |               |
| 21/12/2011 | 34.00 | tazocin                                | linezolid     |
| 29/12/2011 | 34.00 |                                        |               |
| 05/01/2012 | 42.00 |                                        |               |
| 13/01/2012 | 43.00 |                                        |               |
| 06/03/2012 | 37.00 | piperacillin, tazobactam, teicoplanin  |               |
| 09/03/2012 | 43.00 |                                        |               |
| 12/03/2012 | 43.00 |                                        |               |
| 15/03/2012 | 40.00 |                                        |               |
| 02/05/2012 |       |                                        |               |
| 19/07/2012 | 25.00 | piperacillin, tazobactam, teicoplanin  |               |
| 26/07/2012 | 42.00 |                                        |               |
| 31/07/2012 | 2.65  |                                        |               |
| 01/08/2012 | 45.00 |                                        |               |
| 06/08/2012 | 41.00 |                                        |               |
| 14/09/2012 | 42.00 |                                        |               |
| 18/10/2012 | 24.00 | tazocin, targocid                      |               |
| 25/10/2012 | 38.00 |                                        |               |

|            |       |                                       |           |
|------------|-------|---------------------------------------|-----------|
| 31/10/2012 | 42.00 |                                       |           |
| 12/12/2012 | 38.00 |                                       |           |
| 08/04/2013 | 28.00 | piperacillin, tazobactam, teicoplanin |           |
| 14/04/2013 | 39.00 |                                       |           |
| 17/04/2013 | 38.00 |                                       |           |
| 22/04/2013 | 39.00 |                                       |           |
| 29/04/2013 | 40.00 |                                       |           |
| 17/05/2013 | 35.00 |                                       |           |
| 01/08/2013 | 37.00 |                                       | linezolid |
| 23/09/2013 | 34.00 |                                       |           |
| 04/10/2013 | 36.00 | piperacillin, tazobactam, teicoplanin |           |
| 09/10/2013 | 39.00 |                                       |           |
| 14/10/2013 | 42.00 |                                       |           |
| 18/10/2013 | 41.00 |                                       | linezolid |
| 08/11/2013 | 43.00 |                                       |           |
| 10/01/2014 |       | teicoplanin, meropenem, amikacin      |           |
| 16/01/2014 | 42.60 |                                       |           |
| 23/01/2014 | 40.40 |                                       |           |
| 27/01/2014 | 40.00 |                                       |           |
| 28/04/2014 | 36.00 |                                       | linezolid |
| 05/05/2014 | 46.00 |                                       |           |
| 23/06/2014 | 36.00 |                                       |           |
| 14/07/2014 | 23.00 | amikacin, targocid, tazocin           |           |
| 28/07/2014 | 38.00 |                                       |           |
| 11/08/2014 | 35.00 |                                       |           |
| 31/10/2014 | 29.90 | meropenem, amikacin                   | linezolid |
| 07/11/2014 | 33.20 |                                       |           |
| 11/11/2014 | 37.00 |                                       |           |
| 14/11/2014 | 36.40 |                                       |           |
| 03/12/2014 | 35.40 |                                       | linezolid |
