# Supplementary material for: Persistence and Microevolution of Pseudomonas aeruginosa in the Cystic Fibrosis Lung: A Single-Patient Longitudinal Genomic Study
Source: PubMed Central journal article supplement (PMC6340092; doi:10.3389/fmicb.2018.03242), 2019-01-11
Supplement: Table_2.pdf [file Table_2.pdf]

**Additional file 3: Table S2. Genome assembly statistics and shared total, high and moderate impact SNPs of the 40 *P. aeruginosa* isolates.**

| Genome accession number | Isolate name | Year of isolation | Sequence type | Number of contigs | Genome size (Kbp) | N50 (Kbp) | %GC   | Total SNPs | High impact variants | Moderate impact variants |
|-------------------------|--------------|-------------------|---------------|-------------------|-------------------|-----------|-------|------------|----------------------|--------------------------|
| MAUO00000000            | TNCF_3       | 2007              | 390           | 139               | 6.636             | 92        | 66.28 | 23926      | 1                    | 258                      |
| MAUP00000000            | TNCF_4M      | 2007              | 390           | 161               | 6.630             | 78        | 66.29 | 18451      | 0                    | 186                      |
| MAUQ00000000            | TNCF_6       | 2007              | 390           | 356               | 6.618             | 31        | 66.28 | 16917      | 0                    | 243                      |
| MAUR00000000            | TNCF_7M      | 2007              | 390           | 259               | 6.623             | 47        | 66.28 | 12983      | 0                    | 132                      |
| MAUS00000000            | TNCF_10      | 2007              | 390           | 101               | 6.643             | 143       | 66.28 | 28588      | 0                    | 231                      |
| MAUT00000000            | TNCF_10M     | 2007              | 390           | 107               | 6.633             | 111       | 66.29 | 27377      | 0                    | 227                      |
| MAZG00000000            | TNCF_12      | 2007              | 390           | 102               | 6.545             | 177       | 66.36 | 27551      | 0                    | 280                      |
| MAZI00000000            | TNCF_13      | 2007              | 390           | 75                | 6.637             | 195       | 66.27 | 28381      | 0                    | 231                      |
| MAZH00000000            | TNCF_14      | 2007              | 390           | 89                | 6.633             | 158       | 66.28 | 28893      | 1                    | 297                      |
| MAKL00000000            | TNCF_16      | 2007              | 1864          | 59                | 6.638             | 269       | 66.28 | 28697      | 0                    | 230                      |
| MAZJ00000000            | TNCF_23      | 2007              | 390           | 71                | 6.635             | 228       | 66.28 | 28430      | 0                    | 232                      |
| MAZK00000000            | TNCF_23M     | 2007              | 390           | 64                | 6.636             | 228       | 66.28 | 28668      | 0                    | 231                      |
| MAKM00000000            | TNCF_32      | 2007              | 390           | 67                | 6.639             | 229       | 66.28 | 28668      | 0                    | 230                      |
| MAZL00000000            | TNCF_32M     | 2007              | 390           | 138               | 6.627             | 93        | 66.28 | 21302      | 0                    | 194                      |
| MAZM00000000            | TNCF_42      | 2008              | 390           | 70                | 6.639             | 228       | 66.28 | 28682      | 0                    | 230                      |
| MAZN00000000            | TNCF_42M     | 2008              | 390           | 71                | 6.640             | 228       | 66.28 | 28691      | 0                    | 230                      |
| MAZO00000000            | TNCF_49M     | 2008              | 390           | 76                | 6.635             | 177       | 66.29 | 28187      | 0                    | 230                      |
| MAZP00000000            | TNCF_68      | 2010              | 390           | 82                | 6.633             | 162       | 66.28 | 28277      | 0                    | 269                      |
| MAZQ00000000            | TNCF_69      | 2010              | 1863          | 88                | 6.639             | 150       | 66.28 | 29398      | 0                    | 344                      |
| MAZR00000000            | TNCF_76      | 2010              | 390           | 61                | 6.634             | 281       | 66.28 | 28793      | 0                    | 251                      |
| MAZS00000000            | TNCF_85      | 2010              | 1864          | 101               | 6.644             | 124       | 66.29 | 28605      | 0                    | 231                      |
| MAZT00000000            | TNCF_88M     | 2010              | 1864          | 65                | 6.636             | 229       | 66.28 | 28678      | 0                    | 231                      |
| MAZU00000000            | TNCF_101     | 2011              | 1864          | 142               | 6.653             | 92        | 66.28 | 28541      | 0                    | 229                      |
| MAZV00000000            | TNCF_105     | 2011              | 390           | 92                | 6.644             | 191       | 66.28 | 29525      | 0                    | 338                      |
| MAZW00000000            | TNCF_106     | 2011              | 390           | 77                | 6.634             | 205       | 66.28 | 29346      | 0                    | 336                      |
| MAZX00000000            | TNCF_109     | 2011              | 390           | 69                | 6.634             | 205       | 66.28 | 28808      | 0                    | 264                      |
| MAZD00000000            | TNCF_130     | 2012              | 390           | 157               | 6.625             | 76        | 66.28 | 24731      | 1                    | 312                      |
| MAZF00000000            | TNCF_133     | 2012              | 390           | 82                | 6.637             | 154       | 66.29 | 29356      | 2                    | 374                      |
| MAZE00000000            | TNCF_133_1   | 2012              | 1864          | 87                | 6.641             | 269       | 66.28 | 28687      | 0                    | 231                      |
| MAKK00000000            | TNCF_151     | 2013              | 390           | 53                | 6.629             | 378       | 66.28 | 29377      | 1                    | 340                      |
| MBMI00000000            | TNCF_151M    | 2013              | 1864          | 103               | 6.636             | 143       | 66.28 | 26177      | 0                    | 221                      |
| MBMJ00000000            | TNCF_154     | 2013              | 390           | 86                | 6.635             | 177       | 66.28 | 27323      | 0                    | 254                      |
| MBMK00000000            | TNCF_155     | 2013              | 390           | 62                | 6.634             | 339       | 66.28 | 29744      | 0                    | 353                      |
| MBML00000000            | TNCF_155_1   | 2013              | 1923          | 71                | 6.635             | 221       | 66.28 | 28689      | 0                    | 255                      |
| MBMM00000000            | TNCF_165     | 2013              | 1923          | 119               | 6.634             | 135       | 66.28 | 26654      | 0                    | 260                      |
| MBMN00000000            | TNCF_167     | 2013              | 390           | 73                | 6.634             | 191       | 66.27 | 29024      | 2                    | 392                      |
| MBMO00000000            | TNCF_167_1   | 2013              | 390           | 91                | 6.628             | 143       | 66.28 | 27629      | 0                    | 335                      |
| MBMP00000000            | TNCF_174     | 2014              | 390           | 111               | 6.645             | 143       | 66.29 | 29317      | 1                    | 353                      |
| MBMQ00000000            | TNCF_175     | 2014              | 390           | 118               | 6.642             | 124       | 66.28 | 29582      | 1                    | 393                      |
| MBMR00000000            | TNCF_176     | 2014              | 1923          | 61                | 6.637             | 354       | 66.28 | 29299      | 0                    | 304                      |
