# Supplementary material for: Persistence and Microevolution of Pseudomonas aeruginosa in the Cystic Fibrosis Lung: A Single-Patient Longitudinal Genomic Study
Source: PubMed Central journal article supplement (PMC6340092; doi:10.3389/fmicb.2018.03242), 2019-01-11
Supplement: Table_3.pdf [file Table_3.pdf]

**Additional file 11: Table S3. Non-neutral evolution test by LTR, and Tajima's D values for each gene selected for the analysis.** See the main text for details about the non-neutrality test comparing models of evolution, Tajima's D was calculated to have further evidence of non-neutral evolution.

| gene name         | omega (M1a) | omega (M2a) | LogL H0 (M1a) | LogL H1      | Likelihood Ratio Test (2*(l1-l0)) with 2 df (>5,991) | under selective pressure | omega (M7) | omega (M8) | LogL H0 (M7) | LogL H1      | Likelihood Ratio Test (2*(l1-l0)) with 2 df | under selective pressure | Tajima's D |
|-------------------|-------------|-------------|---------------|--------------|------------------------------------------------------|--------------------------|------------|------------|--------------|--------------|---------------------------------------------|--------------------------|------------|
| <i>aruF</i>       |             | 0,402       | 0,402         | -1.291,9725  | -1.291,9740                                          | -0,0030                  | no         | 0,402      | 0,402        | -1.291,9725  | -1.291,9728                                 | -0,0006                  | no         |
| <i>cbrA</i>       |             | 1           | 1,12          | -883,3932    | -883,3882                                            | 0,0101                   | no         | 1          | 1,12         | -883,3932    | -883,3882                                   | 0,0101                   | no         |
| <i>chpA</i>       | 0,77        | 1,417       | -10.486,4352  | -10.474,7069 | 23,4566                                              | yes                      | 1          | 1,417      | -10.486,6790 | -10.474,7078 | 23,9424                                     | yes                      | -1,93      |
| <i>ftsJ</i>       |             | 1           | 1,12          | -883,3932    | -883,3882                                            | 0,0101                   | no         | 1          | 1,12         | -883,3932    | -883,3882                                   | 0,0101                   | no         |
| <i>gidA</i>       | 0,501       | 2,241       | -2.696,9706   | -2.688,2459  | 17,4495                                              | yes                      | 0,5        | 2,241      | -2.696,9707  | -2.688,2462  | 17,4490                                     | yes                      | -1,65      |
| <i>glnE</i>       | 1           | 1           | -4.164,6365   | -4.164,6365  | 0,0000                                               | no                       | 1          | 1,318      | -4.164,6365  | -4.164,5473  | 0,1785                                      | no                       | -1,98      |
| <i>gltB</i>       | 0,618       | 2,179       | -6.159,6129   | -6.149,4395  | 20,3468                                              | yes                      | 0,4        | 2,986      | -6.168,9490  | -6.150,0270  | 37,8441                                     | yes                      | -1,36      |
| <i>gyrB</i>       | 1           | 13,00       | -3.380,5391   | -3.370,0833  | 20,9115                                              | yes                      | 1          | 13,49      | -3.380,5392  | -3.370,9076  | 19,2631                                     | yes                      | -0,06      |
| <i>nagE</i>       | 1           | 38,787      | -2.484,3199   | -2.473,3311  | 21,9775                                              | yes                      | 1          | 38,78      | -2.484,3188  | -2.473,3298  | 21,9780                                     | yes                      | -2,26      |
| <i>ParE</i>       | 1           | 24          | -2.655,0258   | -2.645,9685  | 18,1145                                              | yes                      | 1          | 24,4       | -2.655,0265  | -2.645,9685  | 18,1159                                     | yes                      | -0,66      |
| <i>PmrB</i>       | 1           | 2,16        | -2.005,4163   | -2.005,1474  | 0,5378                                               | no                       | 1          | 2,1611     | -2.005,4163  | -2.005,1543  | 0,5240                                      | no                       | -0,8       |
| <i>pvdL</i>       | \           | \           | \             | \            | \                                                    | \                        | \          | \          | \            | \            | \                                           | \                        | N/A        |
| <i>15595416 *</i> | 0,486       | 0,486       | -2.140,5747   | -2.140,5747  | 0,0000                                               | no                       | 0,485      | 0,486      | -2.140,5749  | -2.140,5749  | 0,0000                                      | no                       | -2,33      |
| <i>15595440 *</i> | 1           | 1,573       | -942,6485     | -942,5663    | 0,1642                                               | no                       | 1          | 1,573      | -942,6488    | -942,5659    | 0,1658                                      | no                       | -1,87      |
| <i>15595766 *</i> |             | 1           | 80,768        | -655,5545    | -654,6594                                            | 1,7902                   | no         | 1          | 998          | -655,5546    | -654,6460                                   | 1,8172                   | no         |
| <i>15596248 *</i> | 1           | 3,5         | -1.940,2519   | -1.937,2854  | 5,9331                                               | no                       | 1          | 3,5        | -1.940,2519  | -1.937,2854  | 5,9331                                      | no                       | -2,03      |
| <i>15596746 *</i> | 0,522       | 2,042       | -3.438,3693   | -3.427,6205  | 21,4976                                              | yes                      | 0,5        | 2,034      | -3.438,3685  | -3.427,6870  | 21,3631                                     | yes                      | -1,61      |
| <i>15597414 *</i> | 1           | 999         | -1.542,2655   | -1.540,7609  | 3,0093                                               | no                       | 1          | 998        | -1.542,2655  | -1.540,7609  | 3,0093                                      | no                       | -1,64      |
| <i>15597654 *</i> | 0,2320      | 2,19        | -1.560,9988   | -1.544,3529  | 33,2918                                              | yes                      | 0,3        | 2,191      | -1.561,0650  | -1.544,3530  | 33,4240                                     | yes                      | -1,4       |
| <i>15599121 *</i> | 0,5361      | 1,7982      | -1.683,4464   | -1.676,3017  | 14,2893                                              | yes                      | 1          | 1,7355     | -1.683,8311  | -1.676,3156  | 15,0312                                     | yes                      | -1,7       |
