# Supplementary material for: Persistence and Microevolution of Pseudomonas aeruginosa in the Cystic Fibrosis Lung: A Single-Patient Longitudinal Genomic Study
Source: PubMed Central journal article supplement (PMC6340092; doi:10.3389/fmicb.2018.03242), 2019-01-11
Supplement: Table_4.pdf [file Table_4.pdf]

**Additional file 12: Table S4. Phenotypic assays.** Qualitative assessment of mucoid phenotype and biofilm formation assays are reported.

| Isolate    | Mucoid phenotype | Biofilm production (OD 695/600) |         |
|------------|------------------|---------------------------------|---------|
|            |                  | Mean                            | SD      |
| TNCF_3     | NO               | 0.2538                          | 0.2767  |
| TNCF_4M    | YES              | 0.0266                          | 0.0392  |
| TNCF_6     | NO               | 0.1719                          | 0.1415  |
| TNCF_7M    | YES              | 0.0185                          | 0.0163  |
| TNCF_10    | NO               | 0.0059                          | 0.0098  |
| TNCF_10M   | YES              | 0.0132                          | 0.0187  |
| TNCF_12    | NO               | 0.0563                          | 0.0381  |
| TNCF_13    | YES              | 0.0049                          | 0.0075  |
| TNCF_14    | NO               | 1.1492                          | 1.4577  |
| TNCF_16    | YES              | 0.0232                          | 0.0246  |
| TNCF_23    | NO               | 0.0056                          | 0.0092  |
| TNCF_23M   | YES              | 0.0046                          | 0.0074  |
| TNCF_32    | NO               | 0.0294                          | 0.0641  |
| TNCF_32M   | YES              | 0.004                           | 0.0072  |
| TNCF_42    | NO               | 0.0032                          | 0.0051  |
| TNCF_42M   | YES              | 0.0035                          | 0.0042  |
| TNCF_49M   | YES              | 0.0136                          | 0.0236  |
| TNCF_68    | NO               | 0.1404                          | 0.086   |
| TNCF_69    | NO               | 0.3606                          | 0.2108  |
| TNCF_76    | NO               | 53.8531                         | 16.8565 |
| TNCF_85    | YES              | 0.0649                          | 0.0783  |
| TNCF_88M   | YES              | 0.0177                          | 0.0188  |
| TNCF_101   | NO               | 0.1535                          | 0.0999  |
| TNCF_105   | NO               | 2.3635                          | 2.2542  |
| TNCF_106   | NO               | 0.7177                          | 0.5608  |
| TNCF_109   | NO               | 1.262                           | 1.63    |
| TNCF_130   | NO               | 1.4477                          | 1.366   |
| TNCF_133   | NO               | 0.0336                          | 0.0598  |
| TNCF_133_1 | NO               | 0.0086                          | 0.0119  |
| TNCF_151   | NO               | 4.4742                          | 2.2776  |
| TNCF_151M  | YES              | 0.0176                          | 0.0087  |
| TNCF_154   | NO               | 0.1406                          | 0.1426  |
| TNCF_155   | NO               | 0.0046                          | 0.0124  |
| TNCF_155_1 | NO               | 0.9051                          | 1.1274  |
| TNCF_165   | NO               | 0.0113                          | 0.0257  |
| TNCF_167   | NO               | 0.1702                          | 0.2495  |
| TNCF_167_1 | NO               | 19.7247                         | 19.1355 |
| TNCF_174   | NO               | 0.0892                          | 0.1629  |
| TNCF_175   | NO               | 0.2394                          | 0.3112  |
| TNCF_176   | NO               | 0                               | 0       |
