# Supplementary material for: Persistence and Microevolution of Pseudomonas aeruginosa in the Cystic Fibrosis Lung: A Single-Patient Longitudinal Genomic Study
Source: PubMed Central journal article supplement (PMC6340092; doi:10.3389/fmicb.2018.03242), 2019-01-11
Supplement: Table_5.pdf [file Table_5.pdf]

**Additional file 13: Table S4. Correlation analysis between phenotypes.** The upper diagonal of the table shows the rho values (grey cells), while the lower diagonal shows the p-values (green cells).

|         | MDR | Mucoidy | Biofilm |
|---------|-----|---------|---------|
| MDR     | -   | -0.77   | 0.65    |
| Mucoidy | 0   | -       | -0.47   |
| Biofilm | 0   | 0.002   | -       |
